# Supplementary material
Source: PubMed Central journal article supplement (PMC4413342)
Supplement: pnas.201422186SI.pdf [file pnas.201422186SI.pdf]

# Supporting Information

Lee et al. 10.1073/pnas.1422186112

## SI Materials and Methods

**Strain and Additional Plasmids.** The *Pseudomonas aeruginosa* parent strain MPAO1 is a PAO1 isolate from the Iglewski laboratory (1). Plasmid pU1 is a derivative of pEX19Tc (2) carrying a “USER” polylinker (3); pU2 is a derivative of pU1 carrying *Escherichia coli* *araC*, the  $P_{BAD}$  promoter, the PAO1 *fusA1* Shine-Dalgarno sequence, and seven additional nucleotides upstream of PAO1 *fusA1*, followed by five codons of *fusA1* and seven codons derived from the plasmid multiple cloning site; pU3 is identical to pU2 with *lacI<sup>q</sup>-P<sub>tac</sub>* in place of *araC-P<sub>BAD</sub>*. Sequence files and details of the constructions of plasmids pU1-pU3 are available by request from C.M.

**Growth Media.** LB agar (per liter): 10 g tryptone, 5 g yeast extract, 8 g NaCl, 15 g Bacto agar; supplemented in some cases with tetracycline (60  $\mu$ g/mL) and chloramphenicol (10  $\mu$ g/mL).

LB agar, 2 $\times$  (per liter): 20 g tryptone, 10 g yeast extract, 8 g NaCl, 30 g Bacto agar; supplemented with tetracycline (60  $\mu$ g/mL) and chloramphenicol (10  $\mu$ g/mL).

MOPS-pyruvate agar (per liter): 100 mL 10 $\times$  MOPS (400 mM MOPS buffer, 40 mM tricine, 0.1 mM FeSO<sub>4</sub>, 95 mM NH<sub>4</sub>Cl, 2.76 mM K<sub>2</sub>SO<sub>4</sub>, 5  $\mu$ M CaCl<sub>2</sub> and 5.25 mM MgCl<sub>2</sub>, adjusted to pH 7.6 with ~330 mM KOH), 10 mL 0.132 M K<sub>2</sub>HPO<sub>4</sub>, 10 mL 20% (wt/vol) sodium pyruvate, 15 g Bacto agar; supplemented with tetracycline (90  $\mu$ g/mL) and chloramphenicol (10  $\mu$ g/mL).

Cystic fibrosis sputum agar: Sputum was obtained from consenting cystic fibrosis patients under a study protocol approved by the University of Washington Institutional Review Board (#31279), and samples were stored at -20 °C. The sputum samples were thawed in cold water before addition of equal volume of sterile deionized water and then homogenized for three minutes in a Polytron PT 3100 homogenizer. The samples were further liquified using three sonication treatments (Ultrasonic Homogenizer 4710 series, Cole-Parmer Instrument Co.; power setting 5, duty cycle 50%, 50 s each). Samples were then sterilized by the addition of chloroform [2% (vol/vol) final] and vortex mixed for 30 s. Chloroform was removed by centrifuging the samples (1,000  $\times$  g for 10 min) and removing the aqueous sputum phase. Sputum samples were then diluted to achieve a final concentration of 10% (vol/vol) sputum from the initial sample and solidified with 1.5% (wt/vol) agar. Antibiotic supplements were tetracycline (70  $\mu$ g/mL) and chloramphenicol (10  $\mu$ g/mL); 2.5  $\mu$ M FeSO<sub>4</sub> was added to two of the four batches of sputum agar used to increase the efficiency of *P. aeruginosa* colony formation.

LB agar, 0.1 $\times$  (per liter): 1 g tryptone, 0.5 g yeast extract, 100 mL 10 $\times$  MOPS, 10 mL 0.132 M K<sub>2</sub>HPO<sub>4</sub>, 10 mL 20% (wt/vol) sodium pyruvate, 10 mL 20% (wt/vol) glucose, 15 g Bacto agar; 10  $\mu$ g/mL each adenosine, guanosine, cytidine, thymidine, and uridine; 1  $\mu$ g/mL each biotin, folic acid, hemin, lipoic acid, nicotinic acid, pantothenic acid, pyridoxine, riboflavin, thiamine, and 2,6-diaminopimelic acid; supplemented with tetracycline (50  $\mu$ g/mL) and chloramphenicol (10  $\mu$ g/mL).

Human serum agar (per liter): 5% (vol/vol) human serum (heat-inactivated; Sigma H3667), 2.5  $\mu$ M FeSO<sub>4</sub>, 15 g Bacto agar; supplemented with tetracycline (52.5  $\mu$ g/mL) and chloramphenicol (10  $\mu$ g/mL).

BHI agar (per liter): 52 g BHI agar (Difco 241830), 2 g yeast extract, 1 mM MgSO<sub>4</sub>; 5  $\mu$ g/mL each adenosine, guanosine, cytidine, thymidine and uridine; glutamine (100  $\mu$ g/mL), 2,6-diaminopimelic acid (400  $\mu$ g/mL), hemin (5  $\mu$ g/mL); 1  $\mu$ g/mL each biotin, folic acid, lipoic acid, nicotinic acid, pantothenic acid,

pyridoxine, riboflavin and thiamine; supplemented with tetracycline (60  $\mu$ g/mL) and chloramphenicol (10  $\mu$ g/mL).

**Mutant Selection.** Mating mixtures were thawed for 1 h before plating. For selection on LB and BHI agar, thawed cell mixtures (originally frozen in LB-DMSO) were plated directly on selection agar. For selection on media other than LB agar, thawed cell mixtures (originally frozen in MOPS-pyruvate-DMSO or LB-DMSO) were plated directly or resuspended in 40 mM MOPS + 10 mM MgSO<sub>4</sub> pH 7.6 buffer and plated. Mating mixes were plated on Bioassay QTrays (Molecular Devices, part #X6023; 240  $\times$  240  $\times$  20 mm) aiming for 30,000 mutants per QTray. Incubation times varied depending on the selective medium: LB and 0.1 $\times$  LB agars, 24 h; MOPS-pyruvate, sputum, and serum agars, 36 h; and BHI agar, 19.5 h. Cells were harvested after flooding plates with 24-mL buffer (or media) and suspending bacteria.

**Sequence Data Analysis.** Processing of Illumina sequence reads was carried out as described previously (4), with reads per insertion location calculated using a custom script ([www.nwrce.org/software-utilities](http://www.nwrce.org/software-utilities), “Tn-seq”). In a few cases for which reads could not be mapped to an exact location because of repetitive genome sequences, they were randomly assigned one of the possible locations. (Presumably, most repetitive sequences are not essential because of redundancy.) A second script was used to annotate the insertion locations and tabulate the number of hits per gene ([www.nwrce.org/software-utilities](http://www.nwrce.org/software-utilities), “Tn-seq”) using the current genome annotation for PAO1-UW (NC\_002516) (5). Tn-seq results were normalized to 10,000,000 reads per pool.

For each Tn-seq assay, two values were calculated for each locus: transposon insertions per kilobase (“hits/kb”) and transposon sequence reads per kilobase (“reads/kb”). To discount non-disruptive insertions in the 5' and 3' ends of loci, only insertions within the 5–90% of each locus were considered. Hit and read density was calculated by dividing hits (5–90%) and reads (5–90%) by locus length (5–90%). Hit and read densities were calculated for a total of 5,573 annotated coding sequences.

Next, the distributions of hits per gene and reads per gene for each Tn-seq assay were calculated. Genes with zero values were considered essential. The remaining assignments (reads per gene and hits per gene) were log<sub>2</sub>-transformed and data were fit to a normal distribution (Fig. S3). Loci with values falling below a  $P = 0.001$  cut-off for each distribution were added to the 0-value set for the final set of candidate essential loci for the corresponding Tn-seq run. In practice, the essential gene assignments derived from the reads per gene and hits per gene analyses were nearly the same for each assay.

The final step of the analysis was to determine the consensus sets of essential genes for the three primary growth conditions analyzed using multiple pools (LB, MOPS-pyruvate, and sputum media). First, for two of the mutant pools for which multiple technical replicates were available (LB-1, and LB-2), genes that were scored as essential in at least two of three assays (LB-1) or at least one of two assays (LB-2) were included. Second, the consensus sets of essential genes for each of the three growth conditions were derived from those genes found for at least two of three LB pools, two of three MOPS-pyruvate pools, or three of four sputum agar pools.

**Identifying Essential Regions by Gap Size Analysis.** As an independent procedure to detect genes with essential domains and unidentified essential genes, we analyzed the distribution of gaps

between transposon insertions in the genome (6). We examined the combined insertions from all 13 mutant pools (corresponding to 1,043,276 unique insertion sites). (For the LB-1 and LB-2 mutant pools, the hits and reads values for the technical replicates were averaged to derive a representative dataset for each.) A histogram of gaps of different lengths for the experimental values is shown in Fig. S5 (blue bars) compared with the distribution seen for a simulation based on random positioning of the same number of unique insertion sites (red bars). The simulation allowed a unique hit in either orientation at each nucleotide and assumed every position in the genome and was equally likely to be hit.

As gap sizes increased, the disparity between the experimental and simulated distributions increased, reflecting the essential regions that did not tolerate insertions. For gaps larger than 100 bp, virtually all (>99.9%) of those seen experimentally could not be accounted for by chance. Recognizing that mutagenesis may not be completely random, even for nonessential regions, we used a conservative cut-off of 150 bp to assign essential regions. There were 833 gaps of at least this length in the combined mutant pool. The gaps overlapped with 303 of 329 general essential coding genes identified using the method described in the previous section. It also identified 22 new genes with both essential and nonessential regions, and 1 gene that had not been recognized in the genome sequence annotation. The total number of general essential genes including those with essential domains was thus 352 (329 + 22 + 1).

#### Construction of Strains with Conditionally Expressed Essential Genes.

To create strains with essential genes expressed from inducer-dependent promoters, we used a plasmid single-integration procedure in which an inducible promoter replaced the native promoter. Plasmids carried an inducible promoter ( $P_{BAD}$  or  $P_{tac}$ ) adjacent to sequences corresponding to the 5' regions of essential operons, oriented such that integration at homologous sequences replaced the native promoter in the genome with one of the inducible promoters. The plasmids used for the integrations were constructed from pU2 and pU3 by insertion of PCR fragments using uracil ("USER") cloning (3). The final constructs were designed to carry an inducible promoter ( $P_{BAD}$  or  $P_{tac}$ ), the PAO1 *fusA1* Shine–Dalgarno sequence and seven additional nucleotides upstream of PAO1 *fusA1*, followed by five codons of *fusA1*, seven codons derived from the plasmid multiple cloning site, and finally sequences corresponding to the target essential gene starting at its second codon. (The N-terminal sequence of each final protein product is expected to be MARTTGTAETTF followed by the second amino acid of the target gene product.) For most genes (>600-bp long), the 5' sequences inserted into

the plasmid were 0.4–0.6 kbp; for small genes, shorter sequences were inserted corresponding to the essential 5' regions that had been identified by Tn-seq. Fragments were amplified from MPAO1 genomic DNA using Taq polymerase and cloned into the linearized pU2 and pU3 vectors by the "USER" method (3). Products were electroporated into DH5 $\alpha$  cells, then plated on LB supplemented with tetracycline (15  $\mu$ g/mL) and 5-bromo-4-chloro-3-indolyl galactoside (40  $\mu$ g/mL). White colonies were screened by PCR for plasmid inserts of an appropriate size; the corresponding plasmids were isolated and transformed into the *E. coli* strain SM10  $\lambda$  pir for use in conjugation. For conjugation with MPAO1, donor *E. coli* strains were grown overnight at 30 °C, diluted to OD<sub>600</sub> 0.3, then grown at 37 °C with aeration to OD<sub>600</sub> 1.0 (~3 h). MPAO1 colonies grown on LB agar were suspended to an OD<sub>600</sub> of 0.2 in LB and grown for 22–24 h at 42 °C without agitation. MPAO1 cells were mixed with *E. coli* donor cells in a 1:1 ratio in 1.5-mL microcentrifuge tubes, pelleted, washed with 10 mM MgSO<sub>4</sub>, and then resuspended in 50  $\mu$ L of LB + 10 mM MgSO<sub>4</sub>. Mixtures were spotted on 0.45- $\mu$ m Millipore filters on LB agar, and incubated 3 h at 37 °C. Bacteria were removed from filters by vortex mixing in LB and small volumes were plated on selective media containing appropriate inducers [LB agar supplemented with tetracycline (60  $\mu$ g/mL), chloramphenicol (10  $\mu$ g/mL) and either isfopropyl- $\beta$ -D-thiogalactopyranoside (2 mM) or arabinose (0.2%)]. Plates were incubated 24–36 h, and single colonies that grew were colony-purified and tested for inducer-dependence by streaking onto LB agar + tetracycline with and without appropriate inducer.

#### Construction of LPS O-Antigen and Pyocin R2 Deletion Mutants.

Three MPAO1 deletion mutants were constructed using integration-excision of appropriate sequences generated by PCR and cloned into pU1 (2). Mutants were constructed on MOPSPyruvate agar, a permissive condition, because of the expected essentiality status of the deleted genes on LB agar. The  $\Delta waaL$  (PA4999) mutant was deleted of coding sequence from the sixth codon of the 5' end to the seventh codon from the 3' end. The  $\Delta wbpM$  (PA3141) mutant was deleted of coding sequence from the 3rd codon to the 13th codon from the end. The  $\Delta wbp$ -operon (PA3141-PA3157) mutant was deleted of coding sequence from the 6th codon of the 5' end of PA3157 to the 13th codon from the 3' end of PA3141. All three deletions were in-frame and carried SacI sites at their deletion sites.

To create double mutants, pyocin R2 deletion mutations [ $\Delta$ (PA0615-PA0628)] were introduced into the O-antigen deletion mutants using a previously described plasmid (7) by integration-excision. The deletion extends from the 111th codon of PA0615 to the 88th codon from the 3' end of PA0628 (8, 9).

- Jacobs MA, et al. (2003) Comprehensive transposon mutant library of *Pseudomonas aeruginosa*. *Proc Natl Acad Sci USA* 100(24):14339–14344.
- Hoang TT, Karkhoff-Schweizer RR, Kutchma AJ, Schweizer HP (1998) A broad-host-range Flp-FRT recombination system for site-specific excision of chromosomally-located DNA sequences: Application for isolation of unmarked *Pseudomonas aeruginosa* mutants. *Gene* 212(1):77–86.
- Bitinaite J, et al. (2007) USER friendly DNA engineering and cloning method by uracil excision. *Nucleic Acids Res* 35(6):1992–2002.
- Gallagher LA, Shendure J, Manoil C (2011) Genome-scale identification of resistance functions in *Pseudomonas aeruginosa* using Tn-seq. *MBIO* 2(1):e00315–e10.
- Winsor GL, et al. (2011) *Pseudomonas* Genome Database: Improved comparative analysis and population genomics capability for *Pseudomonas* genomes. *Nucleic Acids Res* 39(Database issue):D596–D600.
- Christen B, et al. (2011) The essential genome of a bacterium. *Mol Syst Biol* 7:528.
- Penterman J, et al. (2014) Rapid evolution of culture-impaired bacteria during adaptation to biofilm growth. *Cell Reports* 6(2):293–300.
- Baba T, et al. (2006) Construction of *Escherichia coli* K-12 in-frame, single-gene knockout mutants: The Keio collection. *Mol Syst Biol* 2:2006.0008.
- Barquist L, et al. (2013) A comparison of dense transposon insertion libraries in the *Salmonella* serovars Typhi and Typhimurium. *Nucleic Acids Res* 41(8):4549–4564.

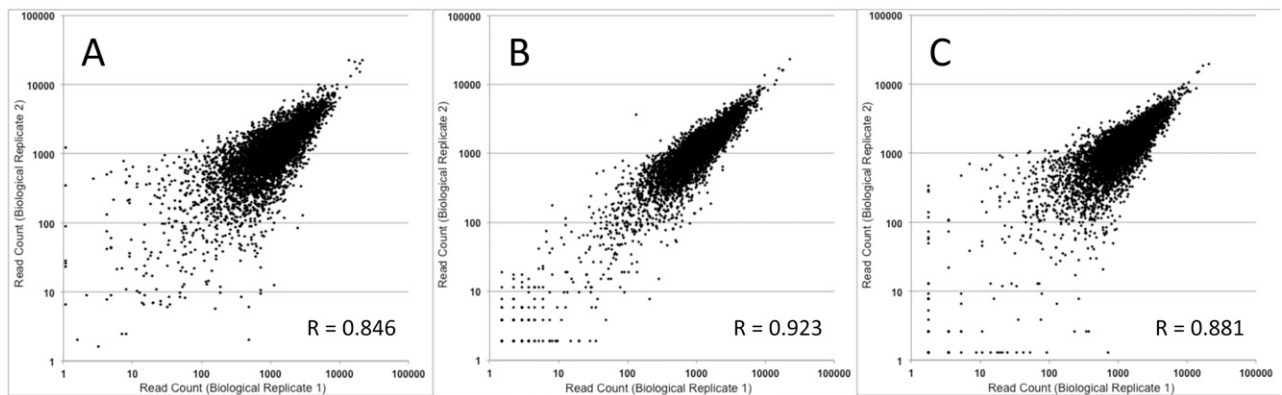

**Fig. S1.** Tn-seq biological replicates. The sequence read counts per gene for two independent mutant pools for each of the three primary growth conditions analyzed are compared. (A) LB agar; (B) MOPS-pyruvate agar; (C) Sputum agar. R, correlation coefficient.

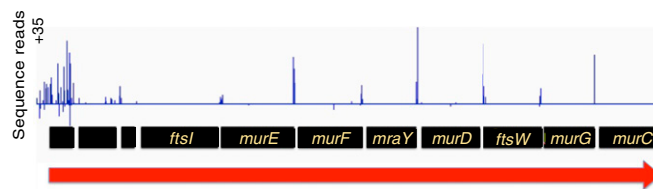

**Fig. S2.** Transposon insertions in a long operon with multiple essential genes. Except for the first gene of the operon, which is nonessential, nearly all of the insertions fall in regions between genes. The insertions show an extreme orientation bias, such that the outward-facing promoter in the transposon allows expression of downstream genes, evidently overcoming polar effects associated with transposon insertions.

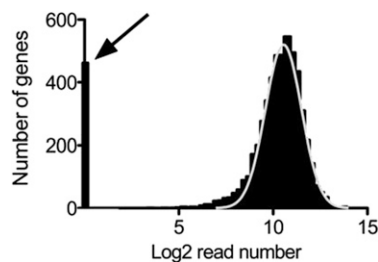

**Fig. S3.** Distribution of sequence reads per gene in a representative Tn-seq assay. The distribution of reads per gene for one Tn-seq assay (LB-1) is shown. Reads corresponding to 5–90% of the predicted ORF for each gene ( $\log_2$ -transformed) are plotted, normalized for gene length, and to 10 million reads total. Reads per gene (minus outliers at the origin corresponding to genes with no reads) follows an approximately normal distribution, as indicated. A gene was classified as a candidate essential in this Tn-seq run example if the x-axis value was less than 6.3 ( $P < 0.001$ ), although most candidate essentials lacked reads altogether (indicated by the arrow).





**Table S2. Inducer growth-dependence of strains carrying essential operons controlled by arabinose ( $P_{BAD}$ ) and *trp-lac* ( $P_{tac}$ ) promoters**

| Locus tag                                   | Gene or operon*                           | Promoter        |                 |
|---------------------------------------------|-------------------------------------------|-----------------|-----------------|
|                                             |                                           | $P_{BAD}$       | $P_{tac}$       |
| PA3126 (control)                            | <i>ibpA</i>                               | —               | —               |
| PA0001-PA0002-(PA0003)-PA0004               | <i>dnaA-dnaN-(recF)-gyrB</i>              | NA              | —               |
| PA0004 <sup>†</sup>                         | <i>gyrB</i>                               | ++              | +               |
| PA0006-(PA0005)                             | <i>yaeD-(lptA)</i>                        | —               | —               |
| PA0019                                      | <i>def</i>                                | +               | +               |
| PA0363                                      | <i>coaD</i>                               | ++              | —               |
| PA0376                                      | <i>rpoH</i>                               | ++              | +               |
| PA0548-(PA0549)                             | <i>tktA</i> -(PA0549)                     | ++ <sup>‡</sup> | ++              |
| PA0555-(PA0556)                             | <i>fda</i> -(PA0556)                      | NA              | +               |
| PA0576                                      | <i>rpoD</i>                               | NA              | +               |
| PA0577                                      | <i>dnaG</i>                               | ++              | —               |
| PA0580                                      | <i>gcp</i>                                | +               | —               |
| PA0595-PA0594-PA0593                        | <i>lptD-surA-pdxA</i>                     | NA              | +               |
| PA0655 <sup>†</sup>                         | PA0655                                    | + <sup>‡</sup>  | —               |
| PA0759                                      | PA0759                                    | +               | —               |
| PA0903                                      | <i>alaS</i>                               | +               | +               |
| PA0947                                      | PA0947                                    | ++              | —               |
| PA0969-PA0970-PA0971-PA0972-PA0973-(PA0974) | <i>tolQ-tolR-tolA-tolB-oprL</i> -(PA0974) | NA              | ++              |
| PA0973-(PA0974) <sup>†</sup>                | <i>oprL</i> -(PA0974)                     | ++              | ++ <sup>‡</sup> |
| PA1151                                      | <i>imm2</i>                               | NA              | ++              |
| PA1156                                      | <i>nrdA</i>                               | NA              | ++ <sup>‡</sup> |
| PA1165                                      | <i>pcpS</i>                               | —               | —               |
| PA1528                                      | <i>zipA</i>                               | NA              | ++              |
| PA1585-PA1586-PA1587                        | <i>sucA-sucB-lpdG</i>                     | NA              | +               |
| PA2952-PA2951                               | <i>etfB-etfA</i>                          | +               | +               |
| PA2953                                      | PA2953                                    | ++              | —               |
| PA2968-PA2967                               | <i>fabD-fabG</i>                          | NA              | +               |
| PA3171-(PA3172)-(PA3173)                    | <i>ubiG</i> -(PA3172)-(yciK)              | + <sup>‡</sup>  | —               |
| PA3397                                      | <i>fpr</i>                                | ++              | NA              |
| PA3639-PA3638                               | <i>accA-mesJ</i>                          | NA              | +               |
| PA3655                                      | <i>tsf</i>                                | NA              | ++              |
| PA3686                                      | <i>adk</i>                                | NA              | ++              |
| PA3746                                      | <i>ffh</i>                                | ++              | —               |
| PA3828-PA3827                               | <i>yjgP-yjgQ</i>                          | ++              | NA              |
| PA3984                                      | <i>Int</i>                                | +               | —               |
| PA4031                                      | <i>ppa</i>                                | NA              | ++              |
| PA4044                                      | <i>dxs</i>                                | ++ <sup>‡</sup> | —               |
| PA4366                                      | <i>sodB</i>                               | NA              | ++              |
| PA4403                                      | <i>secA</i>                               | ++              | +               |
| PA4406                                      | <i>lpxC</i>                               | NA              | ++              |
| PA4481-PA4480-PA4479                        | <i>mreB-mreC-mreD</i>                     | NA              | ++              |
| PA4569                                      | <i>ispB</i>                               | +               | + <sup>‡</sup>  |
| PA4762-PA4761                               | <i>grpE-dnaK</i>                          | NA              | +               |
| PA4764                                      | <i>fur</i>                                | NA              | ++              |
| PA4765                                      | <i>omlA</i>                               | NA              | +               |
| PA4991-PA4992                               | PA4991-PA4992                             | +               | ++              |
| PA5239                                      | <i>rho</i>                                | +               | +               |

Constructs with the following genes could not be created with either regulated promoter: PA0442; PA2619 (*infA*); PA2740-PA2739-(PA2738) [*pheS-pheT*-(*himA*)]; PA4264-PA4250 (*rpsJ-rpsN*); PA4270-PA4269 (*rpoB-rpoC*); PA4386-PA4385 (*groES-groEL*). Primer sequences used for constructing regulated essential genes are available from the authors.

\*Locus tags and genes shown in parentheses are nonessential. Operons predictions are from the *Pseudomonas* Genome Database (5).

<sup>†</sup>Genes are predicted to be internal to an operon.

<sup>‡</sup>Two growth phenotypes observed (stronger phenotype reported).

**Table S3. Central carbon metabolism essential functions**

| Function                                            | Gene              | Essentiality |                 |                  |
|-----------------------------------------------------|-------------------|--------------|-----------------|------------------|
|                                                     |                   | LB           |                 | All media*<br>PA |
|                                                     |                   | PA           | EC <sup>†</sup> |                  |
| <b>EMP</b>                                          |                   |              |                 |                  |
| Fructose-1,6-bisphosphatase                         | <i>fbp</i>        | +            | -               | 1-6              |
| Fructose biphosphate aldolase                       | <i>fda</i>        | +            | +               | 1-6              |
| Triosephosphate isomerase                           | <i>tpiA</i>       | +            | -               | 1-3, 5, 6        |
| Glyceraldehyde-3-phosphate dehydrogenase (putative) | PA3001            | -            | +               | 2-6              |
| Phosphoglycerate kinase                             | <i>pgk</i>        | -            | +               | 2-6              |
| Phosphoglycerate mutase                             | <i>pgm</i>        | -            | -               | 2-6              |
| Enolase                                             | <i>eno</i>        | -            | +               | 2-6              |
| <b>PPP</b>                                          |                   |              |                 |                  |
| Transketolase                                       | <i>tktA</i>       | +            | -               | 1-6              |
| Ribose 5-phosphate isomerase                        | <i>rpi</i>        | +            | -               | 1-6              |
| D-ribulose-5-phosphate 3-epimerase                  | <i>rpe</i>        | +            | -               | 1-6              |
| <b>TCA</b>                                          |                   |              |                 |                  |
| Citrate synthase                                    | <i>gltA</i>       | -            | -               | 2, 5, 6          |
| Aconitase                                           | <i>acnB</i>       | +            | -               | 1-6              |
| 2-oxoglutarate dehydrogenase                        | <i>sucAB lpdG</i> | +            | -               | 1-6              |
| Succinyl-CoA synthetase                             | <i>sucCD</i>      | +            | -               | 1, 3, 5, 6       |
| Succinate dehydrogenase                             | <i>sdhABCD</i>    | +            | -               | 1-6              |
| Fumarase                                            | PA4333            | +            | -               | 1, 3, 5, 6       |

The functions essential for *P. aeruginosa* (PA) growth on LB nutrient medium are compared with those essential for *E. coli* (EC). *P. aeruginosa* essentiality on other media is also shown. Remarkably, three functions of lower glycolysis (glyceraldehyde-3-phosphate dehydrogenase, phosphoglycerate kinase and enolase) are essential on LB for *E. coli* but not *P. aeruginosa*, even though they are essential for *P. aeruginosa* on other media. \*1 = LB; 2 = MOPS-pyruvate; 3 = sputum agar; 4 = 0.1X LB; 5 = serum agar; 6 = BHI.

<sup>†</sup>*E. coli* essential for growth on LB agar (8). An analysis of *S. typhimurium* by Tn-seq gave an identical pattern with the exception that ribose 5-phosphate isomerase was also essential for growth on LB (9).

## Other Supporting Information Files

[Dataset S1 \(XLSX\)](#)
